# Supplementary material for: Structural modeling and analysis of fuel cell: a graph-theoretic approach
Source: PeerJ journal article supplement (doi:10.7717/peerj-cs.1510), 2023-08-28
Supplement: Computer_code.pdf [file Computer_code.pdf]

# Structural Modeling and Analysis of Fuel Cell: A Graph-Theoretic Approach

## Code of Computer Program for Solving NXN Matrix

For the calculation of permanent function of NXN matrix is given in this appendix and value of N can be upto 50. The program is based upon Laplace expansion. Suppose B=(b<sub>ij</sub>) is an NXN matrix then its determinant is given by:

$$|B| = \sum_{j=1}^N b_{ij} C_{ij}$$

$$\text{and } C_{ij} = (-1)^{i+j} M_{ij}$$

Where M<sub>ij</sub> is the i, j minor matrix of B, that is, the determinant of the (n-1) × (n-1) matrix that results from deleting the i-th row and the j-th column of B. For the calculation of permanent function, the cofactor C<sub>ij</sub> is defined as:

$$C_{ij} = M_{ij}$$

Due to this all negative signs in matrix expansion are converted in to positive signs

Variables Used int total Column Number of columns and rows in the matrix double matrix[50][50]

The matrix input by User int z[50]

Variable Array used for calculation of perof2

Functions Used

double per(int) Recursive function that calculates the value of permanent

double perof2(); Calculates the permanent of last 2 elements

\*\*\*\*\*/

int totalColumn;

double matrix[50][50];

int z[50];

double per(int);

double perof2();

\*\*\*\*\*/

Local Variables for main function

int i Temporary integer variable

int j Temporary integer variable

double k Double variable that stores the value returned by per()

\*\*\*\*\*/

void main()

{

int i,j;

double k;

clrscr();

printf("Enter the size of the matrix:");

scanf("%d",&totalColumn);

/\*Input from user the elements of Matrix that is n\*n, i.e., totalColumn\*totalColumn\*/

```

printf("\n Enter the elements of matrix:\n");
for (i = 0;i<=totalColumn-1;i++)
{
for(j = 0;j<=totalColumn-1;j++)
{
printf(" Element [%d][%d]: ",i+1,j+1);
scanf("%lf",&matrix[i][j]);
}
}
printf("\n\n\n\nPress any key to continue....");
getch();
clrscr();
/*Show to user the matrix formed or inputted*/
printf("The matrix is: \n\n");
printf("\n\t");
for(i=0;i<=totalColumn-1;i++)
{
for(j=0;j<=totalColumn-1;j++)
{
printf("%1f ",matrix[i][j]);
}
printf("\n\t");
}
k=per(totalColumn);
printf("\n\nThe final Value is %lf',k);
getch();
}

```

/\*\*\*\*\*\*

This algorithm works as follows... It calculates the values in a row number, i.e., firstly it will call the value of the permanent for first element in the first row, then adds the permanent of second element of the first row and the process continues...

z keeps the check for per2, what is to be calculated for per2. per will make the values for all z elements '1' except those 2 elements whose per2 has to be calculated.

Variables used in per

int i Temporary integer variable

double res Double variable for storing the value returned from per()

double res2 Double variable for storing the value returned from perof2()

double sum Variable for calculating the sum

\*\*\*\*\*/

```

double per(int n)
{
int i;
double res, res2, sum=0;
if((n-2)!=0)
{
int c=0;
for(i=1;i<=totalColumn;i++)
{
if(z[i]==0)
{

```

```

z[i]=1;
z[c]=0;
c=i;
res=per(n-1);
res=(double)(res*matrix[totalColumn-n][i-1]);
sum=sum+res;
}
}
z[c]=0;
}
else
{
res2=perof2();
return(res2);
}
return(sum);
}
/*****

```

This function calculates the value of the matrix 2\*2. The 2\*2 matrix is defined by the array z[].

Variables used in perof2

int i,j Temporary integer variable

int n,m Temporary integer variable

int flag Contains value 0 or 1, acts as Boolean

double res Double variable for storing the value calculated by multiplication

\*\*\*\*\*/

```

double perof2()
{
int i,j,flag=0,n,m;
double res;
for(i=1;i<=totalColumn;i++)
{
if(z[i]==0)
{
if(flag==0)
{
n=i;
flag=1;
}
else
m=i;
}
}
res=(double)((matrix[totalColumn-2][n-1]*matrix[totalColumn-1][m-1])+(matrix[totalColumn-2][m-1]*matrix[totalColumn-1][n-1]));
return res;
}

```
